# Supplementary material
Source: ML conference proceedings conference paper supplement (https://www.ecva.net/papers/eccv_2020/papers_ECCV/html/123580001_ECCV_2020_paper.php)
Supplement: Supplementary file 1 [file 123580001-supp.pdf]

# Fashion Captioning: Towards Generating Accurate Descriptions with Semantic Rewards

Xuewen Yang<sup>1</sup>, Heming Zhang<sup>2</sup>, Di Jin<sup>3</sup>, Yingru Liu<sup>1</sup>, Chi-Hao Wu<sup>2</sup>, Jianchao Tan<sup>4</sup>, Dongliang Xie<sup>5</sup>, Jue Wang<sup>6</sup>, and Xin Wang<sup>1</sup>

<sup>1</sup>Stony Brook University

[xuewen.yang@stonybrook.edu](mailto:xuewen.yang@stonybrook.edu)

<sup>2</sup>USC

<sup>3</sup>MIT

<sup>4</sup>Kwai Inc.

<sup>5</sup>BUPT

<sup>6</sup>Megvii

## 1 Supplementary

### 1.1 More Examples on FACAD

More examples can be found in the online anonymous website:

[https://github.com/xuewyang/Fashion\\_Captioning](https://github.com/xuewyang/Fashion_Captioning).

We also showcase some examples directly in Fig 1.

### 1.2 Categories and Attributes

To showcase the massive categories of FACAD, we split all 74 categories into 5 subsets: top, bottom, one-piece, shoes, bags and accessories and list the 5 subsets in Table 1.

To know more about the details of the items, we display a subset of all attributes in Table 2.

### 1.3 Evaluation Metrics Explained

We provide more information about BLEU, METEOR, ROUGE-L, CIDEr and SPICE metrics. BLEU roughly measures the fraction of N-grams that are in common between a generated one and a groundtruth. METEOR measures uni-gram precision and recall, extending the exact word matches to include similar words based on WordNet synonyms and stemmed tokens. ROUGE-L counts the number of overlapping word sequences between the generated sentence and the groundtruth caption. CIDEr measures the similarity of a generated sentence against a groundtrue caption using sentence similarity. SPICE compares semantic propositional content between a generated sentence and a groundtruth.

**Title:** Drape Collar Knit Blazer

**Fashion Caption:** A softer, more casual version of your workday blazer is made in a comfy cotton knit with a drape collar and raw-edge seams.

**Color:** Black

**Meta:** 26" regular front length; 22" back length (size Medium); 25" petite front length; 21" back length (size Medium P);

Drape collar; Long sleeves blazer; Partially lined; 100% cotton; Hand wash; dry flat; knit

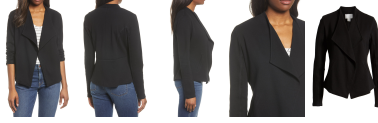**Title:** Rounded V-Neck Tee

**Fashion Caption:** A gently rounded V-neck, short sleeves and a chest pocket style a soft cotton-blend tee in a multitude of colors.

**Color:** White

**Meta:** Rounded V-neck; Short sleeves tee; Semi-sheer; 60% cotton; 40% modal; Machine wash cold; dry flat; Imported; Point of View and Petite Focus

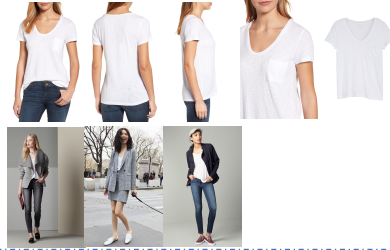**Title:** Canvas Workwear Jacket

**Fashion Caption:** Rugged and ready for anything, this workwear inspired canvas jacket keeps it simple with a sleek button-front and multiple useful pockets.

**Color:** Military Green

**Meta:** Workwear; Front button closure; Spread collar jacket; Button cuffs; Dual-entry hand-warmer pockets; chest zip pocket; 100% cotton; Machine wash; line dry

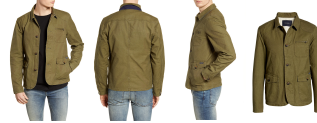**Title:** Yaro Ankle Strap Sandal

**Fashion Caption:** Modern and minimalist, an essential ankle strap sandal set on a chunky wrapped heel serves as a versatile go-to style.

**Color:** Pink

**Meta:** 4" heel (size 8.5); 3" ankle strap height; Adjustable ankle strap with buckle closure sandal; Leather, textile, synthetic or faux-fur; upper/synthetic lining and sole; Imported; Women's Shoes

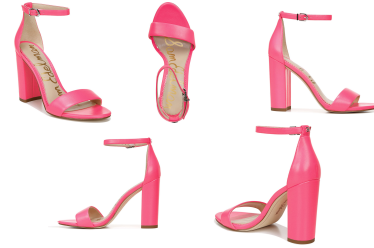**Title:** Reversible Faux Leather Tote & Wristlet

**Fashion Caption:** Supersoft faux leather flips inside-out for a reversible tote while a matching wristlet multiplies your styling options and keeps you organized on the go.

**Color:** Ivory

**Meta:** Magnetic closure; 100% polyurethane; Faux leather; Tote; By Street Level; imported; BP.

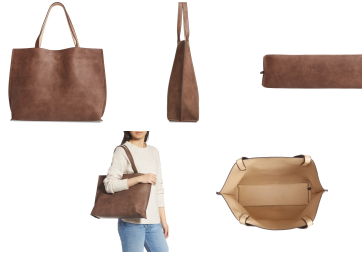

Fig. 1: More examples for FACAD. The images are of different perspectives, colors and scenarios (shop-street). Other information contained include a title, a description (caption) from a fashion expert, the color info and the meta info. Words in color denotes the attributes used in sentence.

Table 1: List of categories.

| subset      | categories                                                                                                                                        |
|-------------|---------------------------------------------------------------------------------------------------------------------------------------------------|
| top         | tee, jacket, sweater, blouse, coat, sweatshirt, bra, cardigan, hood, tank, blazer, top, polo, pullover, camisole, vest, turtleneck, henley, parka |
| bottom      | jeans, pants, shorts, skirt, trousers, legging, trunk, thongs, sweatpants, jeggings, tights, chinos                                               |
| one-piece   | dress, gown, jumpsuit, swimsuit, bodysuit, pajamas, robe, suit, one-piece, bikini, derby, chemise                                                 |
| shoes       | boot, sandal, sneaker, pump, loafer, joggers, flop, slippers, wedge, wingtip, clog                                                                |
| bags        | backpack, handbag, shoulder bag, beach bag, clutch bag, tote bag, belt bag, satchels                                                              |
| accessories | watch, hat, bracelet, gloves, necklace, glasses, wallet, rings, belt, brooches, earrings, tie, scarves                                            |

Table 2: List of attributes.

| attributes                                                                                                                                                                                                                                                                                                                                                                                                                                                                                                                                                                                                                                                                                                                                                                                                                                                                                                                                                                                                                                                                                                                                                                                                                                                                                                                                                                                                                                                                                                                                                                                                                                                                                                                                                                                                                                                                                                                                                                                                                                                                 |
|----------------------------------------------------------------------------------------------------------------------------------------------------------------------------------------------------------------------------------------------------------------------------------------------------------------------------------------------------------------------------------------------------------------------------------------------------------------------------------------------------------------------------------------------------------------------------------------------------------------------------------------------------------------------------------------------------------------------------------------------------------------------------------------------------------------------------------------------------------------------------------------------------------------------------------------------------------------------------------------------------------------------------------------------------------------------------------------------------------------------------------------------------------------------------------------------------------------------------------------------------------------------------------------------------------------------------------------------------------------------------------------------------------------------------------------------------------------------------------------------------------------------------------------------------------------------------------------------------------------------------------------------------------------------------------------------------------------------------------------------------------------------------------------------------------------------------------------------------------------------------------------------------------------------------------------------------------------------------------------------------------------------------------------------------------------------------|
| brief, paillette, slipdress, pull, park, linen, shell, sleeve, knit, maxi, dress, collar, poplin, cotton, wrap, strap, monk, logo, hood, plaid, slingback, water-resistant, fringe, stripe, sport, midi, bralette, paisley, platform, high-waist, faux-leather, front, henley, organic, track, nylon, pocket, stud, flare, thongs, waterproof, tie, neck, sparkle, graffiti, heart, chinos, cocktail, gown, silk, fill, power, brocade, sleeveless, print, skirt, solution, sequin, waffle, satin, biker, graphic, burnout, wide-leg, garment, v-neck, nursing, lace, miniskirt, blouson, chambray, step, hem, wool, straight, zip, ankle, leopard, fit, acid, cable, taper, corduroy, slide, ruffle, crop, boxer, reversible, camisole, slim, velvet, curve, dot, tank, sheath, denim, open, toe, basketball, floral, button, paperbag, trunk, wedding, bodice, chiffon, horse, stretch, crepe, twist, flag, oxford, thermal, cargo, teddy, bear, fur, patent, maternity, ponte, crew-neck, classic, funnel, alpaca, blend, flannel, chukka, pinstripe, seersucker, side, bottom, sundress, cup, dye, isle, jacquard, shoulder, turtleneck, check, center, seam, jersey, athletic, dobby, strapless, pleat, utility, fleece, sweatshirt, pinafore, swim, gingham, wedge, cashmere, rib, lounge, georgette, control, tights, body, herringbone, line, espadrille, waistband, sock, metallic, minidress, board, boucl, reverse, weave, tech, joggers, split, cardigan, french, terry, knee, slit, poncho, trim, con, star, moon, inset, bib, space, chain, vintage, cutout, trench, shaker, stitch, twill, flat, trousers, trumpet, derby, peplum, illusion, mesh, bodysuit, romper, bandeau, keyhole, balloon, ribbed, cozy, slippers, solid, pliss, drawstring, hybrid, cap, merino, racerback, chemise, quarter, matthew, mixed, mountain, fine, gauge, coyote, rainbow, roll, zebra, cuff, portrait, pump, wave, girl, honeycomb, snake, puffer, skin, double, face, organza, butterfly, sheer, army, tunic, prairie, gore, tex, texture, sleep, sweatpants, loafer,... |
